# Supplementary material for: Incidence and Impact of Takotsubo Syndrome in Hospitalized Patients With COVID-19
Source: PubMed Central journal article supplement — Tex Heart Inst J. 2024 May 6;51(1):e238309. doi: 10.14503/THIJ-23-8309 (PMC11075496; doi:10.14503/thij-23-8309), 2024-05-06
Supplement: Supplement.pdf [file Supplement.pdf]

## Supplementary Materials

# Incidence and Impact of Takotsubo Syndrome in Hospitalized COVID-19 Patients

Pengyang Li, MD, MSc<sup>1</sup>; Ao Shi, PhD<sup>2</sup>; Xiaojia Lu, MD<sup>3</sup>; Chenlin Li, MD<sup>3</sup>; Peng Cai, MSc<sup>4</sup>; Catherine Teng, MD<sup>5</sup>; Lingling Wu, MD<sup>6</sup>; Yuan Shu<sup>7</sup>; Su Pan, MD<sup>8</sup>; Richard A. F. Dixon, PhD<sup>8</sup>; Qi Liu, PhD<sup>8</sup>; Bin Wang, MD, PhD<sup>3,9</sup>

<sup>1</sup>Division of Cardiology, Pauley Heart Center, Virginia Commonwealth University, Richmond, Virginia

<sup>2</sup>Faculty of Medicine, St. George University of London, London, United Kingdom

<sup>3</sup>Department of Cardiology, the First Affiliated Hospital of Shantou University Medical College, 57 Changping Road, Shantou, Guangdong, China

<sup>4</sup>Department of Mathematical Sciences, Worcester Polytechnic Institute, Worcester, Massachusetts

<sup>5</sup>Division of Cardiology, Department of Medicine, University of Texas San Antonio, San Antonio, Texas

<sup>6</sup>Department of Medicine, Eastern Carolina University Health Medical Center, Greenville, North Carolina

<sup>7</sup>The Second Clinical Medical College of Nanchang University, Nanchang City, Jiangxi Province, 330000, China

<sup>8</sup>Wafic Said Molecular Cardiology Research Laboratory, The Texas Heart Institute, Houston, Texas

<sup>9</sup>Clinical Research Center, the First Affiliated Hospital of Shantou University Medical College, Shantou, Guangdong, China

**Citation:** *Tex Heart Inst J.* 2024;51(1):e238309. doi: 10.14503/THIJ-23-8309

### Corresponding author:

Dr. Qi Liu, Wafic Said Molecular Cardiology Research Laboratory, The Texas Heart Institute, 6770 Bertner Avenue, MC 2-255, Houston, TX 77030 (QLiu@texasheart.org)

**SUPPLEMENTAL TABLE I. International Classification of Disease, 10th edition, Clinical Modification (ICD-10-CM) Codes Used for Comorbidities and Complications**

| <b>Comorbidities/complications</b> | <b>ICD-10 code</b>                                                              |
|------------------------------------|---------------------------------------------------------------------------------|
| Takotsubo syndrome                 | I5181                                                                           |
| COVID-19                           | U071                                                                            |
| <b>Comorbidities</b>               |                                                                                 |
| Smoking                            | F17-F17299, Z720, Z87891                                                        |
| Hypertension                       | I10, I15-I159                                                                   |
| Diabetes mellitus                  | E10-E109, E11-E119, E13-E139                                                    |
| Hyperlipidemia                     | E780-E785                                                                       |
| Obesity                            | Z683-Z6839, Z684-Z6845, E66-E669                                                |
| Anxiety                            | F064, F40-F409, F41-F419                                                        |
| Depression                         | F32-F329, F33-F339, F341                                                        |
| Obstructive sleep apnea            | G473-G4739                                                                      |
| Chronic kidney disease             | N18-N189                                                                        |
| COPD                               | J41-J418, J42, J43-J439, J44-J449                                               |
| Anemia                             | D50-D59, D60-D64                                                                |
| Cancer                             | C00-C969, D00-D099                                                              |
| <b>Complications</b>               |                                                                                 |
| Cardiac arrest                     | I46-I469                                                                        |
| Cardiogenic shock                  | R570                                                                            |
| Ventricular arrhythmia             | I472, I490-I4902                                                                |
| Acute kidney injury                | N17-N179                                                                        |
| Acute respiratory failure          | J960-J9622                                                                      |
| Mechanical ventilation             | J810, J951, J952, J953, J9584, J960, J962, J80, R0603, 5A19[345]5Z <sup>6</sup> |

COPD, chronic obstructive pulmonary disease; COVID-19, coronavirus disease 2019.

**SUPPLEMENTAL TABLE II. Baseline Characteristics of Unmatched Cohort**

| Variables                                                        | Unmatched Cohort     |                   | P value |
|------------------------------------------------------------------|----------------------|-------------------|---------|
|                                                                  | COVID-19 without TTS | COVID-19 with TTS |         |
| <b>No.</b>                                                       | 211,448              | 171               |         |
| <b>Age, mean (SD), y</b>                                         | 64.26 (16.84)        | 68.95 (12.95)     | <.001   |
| <b>Sex, No. (%)</b>                                              |                      |                   | <.001   |
| Male                                                             | 111,684 (52.8)       | 61 (35.7)         |         |
| Female                                                           | 99,756 (47.2)        | 110 (64.3)        |         |
| Unknown                                                          | 8 (0.0)              | 0 (0.0)           |         |
| <b>Race, No. (%)</b>                                             |                      |                   | .02     |
| White                                                            | 107,524 (50.9)       | 108 (63.2)        |         |
| Black                                                            | 37,912 (17.9)        | 22 (12.9)         |         |
| Hispanic                                                         | 42,411 (20.1)        | 25 (14.6)         |         |
| Asian/<br>Pacific Islander                                       | 6,604 (3.1)          | 8 (4.7)           |         |
| Native American                                                  | 2,131 (1.0)          | 0 (0.0)           |         |
| Other                                                            | 8,425 (4.0)          | 4 (2.3)           |         |
| Unknown                                                          | 6,441 (3.0)          | 4 (2.3)           |         |
| <b>Patient location, No. (%)</b>                                 |                      |                   | .86     |
| "Central" counties of<br>metro areas of ≥1 million<br>population | 66,762 (31.6)        | 60 (35.1)         |         |
| "Fringe" counties of<br>metro areas of ≥1 million<br>population  | 49,135 (23.2)        | 43 (25.1)         |         |
| Counties in metro areas<br>of 250,000-999,999<br>population      | 39,501 (18.7)        | 27 (15.8)         |         |
| Counties in metro areas<br>of 50,000-249,999<br>population       | 18,737 (8.9)         | 15 (8.8)          |         |
| Micropolitan counties                                            | 20,056 (9.5)         | 14 (8.2)          |         |
| Non-metropolitan or<br>micropolitan counties                     | 16,427 (7.8)         | 11 (6.4)          |         |
| NA                                                               | 830 (0.4)            | 1 (0.6)           |         |
| <b>Mean household income,<br/>No. (%)</b>                        |                      |                   | .07     |
| \$1-\$42,999                                                     | 71,345 (33.7)        | 40 (23.4)         |         |
| \$43,000-\$53,999                                                | 57,550 (27.2)        | 55 (32.2)         |         |
| \$54,000-\$70,999                                                | 45,586 (21.6)        | 44 (25.7)         |         |
| \$71,000 or more                                                 | 33,653 (15.9)        | 30 (17.5)         |         |
| Unknown                                                          | 3,314 (1.6)          | 2 (1.2)           |         |
| <b>Primary payer, No. (%)</b>                                    |                      |                   | .03     |
| Medicare                                                         | 10,9532 (51.8)       | 112 (65.5)        |         |

|                                   |                |            |       |
|-----------------------------------|----------------|------------|-------|
| Medicaid                          | 25,491 (12.1)  | 13 (7.6)   |       |
| Private including HMO             | 58,485 (27.7)  | 35 (20.5)  |       |
| Self-pay                          | 7,186 (3.4)    | 4 (2.3)    |       |
| No charge                         | 1 (0.2)        | 0 (0.0)    |       |
| Other                             | 9,826 (4.6)    | 7 (4.1)    |       |
| Unknown                           | 407 (0.2)      | 0 (0.0)    |       |
| <b>Hospital type, No. (%)</b>     |                |            | .10   |
| Rural                             | 24,651 (11.7)  | 14 (8.2)   |       |
| Urban non-teaching                | 40,560 (19.2)  | 26 (15.2)  |       |
| Urban teaching                    | 14,6237 (69.2) | 131 (76.6) |       |
| <b>Hospital region, No. (%)</b>   |                |            | .002  |
| Northeast                         | 37,365 (17.7)  | 36 (21.1)  |       |
| Midwest                           | 49,157 (23.2)  | 56 (32.7)  |       |
| South                             | 88,504 (41.9)  | 49 (28.7)  |       |
| West                              | 36,422 (17.2)  | 30 (17.5)  |       |
| <b>Hospital bed size, No. (%)</b> |                |            | .01   |
| Small                             | 54,200 (25.6)  | 38 (22.2)  |       |
| Medium                            | 61,049 (28.9)  | 36 (21.1)  |       |
| Large                             | 96,199 (45.5)  | 97 (56.7)  |       |
| <b>Comorbidities, No. (%)</b>     |                |            |       |
| Smoking                           | 56,586 (26.8)  | 50 (29.2)  | .52   |
| Hypertension                      | 87,998 (41.6)  | 57 (33.3)  | .03   |
| Diabetes mellitus                 | 85,541 (40.5)  | 70 (40.9)  | .96   |
| Hyperlipidemia                    | 88,805 (42.0)  | 84 (49.1)  | .07   |
| Obesity                           | 59,865 (28.3)  | 40 (23.4)  | .18   |
| Anxiety                           | 27,007 (12.8)  | 42 (24.6)  | <.001 |
| Depression                        | 24,071 (11.4)  | 30 (17.5)  | .02   |
| Obstructive sleep apnea           | 21,753 (10.3)  | 10 (5.8)   | .07   |
| Chronic kidney disease            | 41,573 (19.7)  | 39 (22.8)  | .35   |
| COPD                              | 31,065 (14.7)  | 42 (24.6)  | <.001 |
| Anemia                            | 42,186 (20.0)  | 50 (29.2)  | .003  |
| Cancer                            | 7,566 (3.6)    | 6 (3.5)    | .99   |

COPD, chronic obstructive pulmonary disease; COVID-19, coronavirus disease 2019; TTS, takotsubo syndrome.

**SUPPLEMENTAL TABLE III. Standardized Mean Differences of Covariates Before and After Propensity Score Matching Between COVID-19 patients With and Without TTS.**

| Variable                                                   | Type       | SMD      |         |
|------------------------------------------------------------|------------|----------|---------|
|                                                            |            | Baseline | Matched |
| Age                                                        | Continuous | 0.3119   | 0.0002  |
| <b>Sex</b>                                                 |            |          |         |
| Male                                                       | Binary     | -0.1715  | -0.0234 |
| Female                                                     | Binary     | 0.1715   | 0.0234  |
| Unknown                                                    | Binary     | 0        | 0       |
| <b>Race</b>                                                |            |          |         |
| White                                                      | Binary     | 0.1231   | 0       |
| Black                                                      | Binary     | -0.0506  | 0.0117  |
| Hispanic                                                   | Binary     | -0.0544  | -0.0273 |
| Asian/Pacific Islander                                     | Binary     | 0.0156   | 0.0039  |
| Native American                                            | Binary     | -0.0101  | 0       |
| Other                                                      | Binary     | -0.0165  | 0       |
| Unknown                                                    | Binary     | -0.0071  | 0.0117  |
| <b>Patient location</b>                                    |            |          |         |
| “Central” counties of metro areas of ≥1 million population | Binary     | 0.0351   | 0.0117  |
| “Fringe” counties of metro areas of ≥1 million population  | Binary     | 0.0191   | -0.0253 |
| Counties in metro areas of 250,000-999,999 population      | Binary     | -0.0289  | 0.0078  |
| Counties in metro areas of 50,000-249,999 population       | Binary     | -0.0009  | -0.0019 |
| Micropolitan counties                                      | Binary     | -0.013   | 0       |
| Non-metropolitan or micropolitan counties                  | Binary     | -0.0134  | 0.0097  |
| NA                                                         | Binary     | 0.0019   | -0.0019 |
| <b>Mean household income</b>                               |            |          |         |
| \$1-\$42,999                                               | Binary     | -0.1035  | 0.0068  |
| \$43,000-\$53,999                                          | Binary     | 0.0495   | -0.0136 |
| \$54,000-\$70,999                                          | Binary     | 0.0417   | -0.0244 |
| \$71,000 or more                                           | Binary     | 0.0163   | 0.0292  |
| Unknown                                                    | Binary     | -0.004   | 0.0019  |
| <b>Primary payer</b>                                       |            |          |         |
| \$1-\$42,999                                               | Binary     | 0.137    | -0.0136 |
| Medicare                                                   | Binary     | -0.0445  | -0.0331 |
| Medicaid                                                   | Binary     | -0.0719  | 0.0234  |
| Private including HMO                                      | Binary     | -0.0106  | 0.0058  |

|                          |        |         |         |
|--------------------------|--------|---------|---------|
| Self-pay                 | Binary | -0.0025 | 0       |
| No charge                | Binary | -0.0055 | 0.0175  |
| Other                    | Binary | -0.0019 | 0       |
| <b>Hospital type</b>     |        |         |         |
| Rural                    | Binary | -0.0347 | -0.0039 |
| Urban non-teaching       | Binary | -0.0398 | 0.0058  |
| Urban teaching           | Binary | 0.0745  | -0.0019 |
| <b>Hospital region</b>   |        |         |         |
| Northeast                | Binary | 0.0338  | 0.0136  |
| Midwest                  | Binary | 0.095   | -0.0107 |
| South                    | Binary | -0.132  | -0.0019 |
| West                     | Binary | 0.0032  | -0.001  |
| <b>Hospital bed size</b> |        |         |         |
| Small                    | Binary | -0.0341 | -0.0039 |
| Medium                   | Binary | -0.0782 | 0.0097  |
| Large                    | Binary | 0.1123  | -0.0058 |
| <b>Comorbidities</b>     |        |         |         |
| Smoking                  | Binary | 0.0248  | -0.001  |
| Hyperlipidemia           | Binary | 0.0712  | -0.0273 |
| Hypertension             | Binary | -0.0828 | 0.037   |
| DM                       | Binary | 0.0048  | 0.0117  |
| Obesity                  | Binary | -0.0492 | -0.0078 |
| OSA                      | Binary | -0.0444 | -0.0058 |
| CKD                      | Binary | 0.0315  | -0.0097 |
| COPD                     | Binary | 0.0987  | -0.0019 |
| Anxiety                  | Binary | 0.1179  | 0.0078  |
| Depression               | Binary | 0.0616  | -0.0078 |
| Anemia                   | Binary | 0.0929  | -0.0175 |
| Cancer                   | Binary | -0.0007 | -0.0058 |

CKD, chronic kidney disease; COPD, chronic obstructive pulmonary disease; COVID-19: coronavirus disease 2019; DM, diabetes mellitus; OSA, obstructive sleep apnea; TTS, takotsubo syndrome

**SUPPLEMENTAL TABLE IV. Outcomes of TTS in Non-COVID-19 Cohort**

| <b>Variables</b>                | <b>TTS in Non-COVID-19</b> |
|---------------------------------|----------------------------|
| No. (%)                         | 7,932 (0.13)               |
| <b>Outcomes</b>                 |                            |
| Death, No. (%)                  | 580 (7.31)                 |
| Cardiac Arrest, No. (%)         | 340 (4.29)                 |
| Cardiac Shock, No. (%)          | 558 (7.04)                 |
| Ventricular Arrhythmia, No. (%) | 554 (6.99)                 |
| AKI, No. (%)                    | 2,001 (25.21)              |
| ARF, No. (%)                    | 2,547 (32.11)              |
| Mechanical Ventilation, No. (%) | 1,406 (17.73)              |
| LOS, mean (SD), days            | 6.98 (9.58)                |
| Total charge, mean (SD), USD    | 112,881.40 (227,113.50)    |

AKI, acute kidney injury; ARF, acute respiratory failure; COVID-19, coronavirus disease 2019; LOS, length of stay; TTS, takotsubo syndrome.
